# Supplementary material
Source: publisher figshare collection journal article supplement (https://tandf.figshare.com/ndownloader/files/17544575)
Supplement: Supplementary file 1 [file 17544575]

Supplementary Material 3

Supplementary Table I. Demographics and presence of main symptoms by presence or absence of VVA

|  | **Women evaluable for Parts BCD**  **(N=1066)** | **Women with VVA confirmed**  **(N=926)** | **Women with non-VVA confirmed**  **(N=140)** | ***p*** |
| --- | --- | --- | --- | --- |
| Age (years), mean**±**SD (median) [range] | 58.9±7.2 (58) [45–75] | 59.3±7.3 (58) [45–75] | 56.4±6.2 (56) [45–75] | <0.0005 |
| Age at last menstruation (years), mean**±**SD (median) [range] | 49.3±4.2 (50) [17–59] | 49.4±3.9 (50) [29–59] | 48.5±5.8 (50) [17–59] | 0.269 |
| Weight (Kg), mean**±**SD (median) [range] | 65.6±11.7 (65) [40–130] | 65.6±11.7 (65) [40–130] | 65.4±12.1 (64) [44–109] | 0.849 |
| Height (cm), mean**±**SD (median) [range] | 161.1±6.2 (160) [140–180] | 161.2±6.2 (160) [145–180] | 160.7±6.4 (160) [140–177] | 0.380 |
| BMI (Kg/m2), mean**±**SD (median) [range] | 25.3±4.5 (25) [15.6–48.1] | 25.3±4.6 (25) [15.6–48.1] | 25.4±5.0 (25) [16.8–43.7] | 0.737 |
| Time since menopause (years), mean**±**SD (median) [range] | 9.7±7.3 (8) [1–37] | 9.9±7.3 (8) [1–37] | 7.9±7.0 (6) [1–36] | 0.002 |
| Type of menopause  Natural  Induced by medications  Surgical | 84.5%  5.3%  10.2% | 84.0%  5.5%  10.5% | 87.9%  3.5%  8.6% | 0.470 |
| Relationship status  Married  Single  Widowed  In a relationship | 75.5%  7.6%  7.7%  9.2% | 76.2%  7.1%  8.2%  8.5% | 71.3%  10.6%  4.5%  13.6% | 0.060 |
| Education  Elementary  High School  Graduate | 22.2%  61.1%  16.7% | 22.9%  60.9%  16.2% | 18.0%  62.6%  19.4% | 0.355 |
| Employment status (YES) | 51.6% | 50.4% | 59.4% | 0.048 |
| Tobacco use (YES) | 15.1% | 14.6% | 18.1% | 0.287 |
| Currently sexually active | 65.5% | 64.7% | 70.7% | 0.162 |
| Intercourse (times/month), mean±SD (median) [range] | 3.18±2.5 (2)  [1–16] | 3.1±2.5 (2)  [1–16] | 3.4±2.7 (2)  [1–12] | 0.593 |
| Caucasian ethnic group | 98.9% | 99.1% | 97.8% | 0.106 |
| Childbirth (YES) | 83.7% | 83.8% | 82.9% | 0.768 |
| Abortion/miscarriage (YES) | 31.0% | 31.4% | 28.6% | 0.508 |
| **VVA Symptoms** |  |  |  |  |
| Vaginal dryness | 84.1% | 87.3% | 63.6% | <0.0005 |
| Pain during intercourse/penetration | 61.5% | 63.6% | 47.9% | <0.0005 |
| Pain during exercise | 16.0% | 17.1% | 9.3% | 0.019 |
| Bleeding during intercourse | 15.7% | 17.3% | 5.0% | <0.0005 |
| Burning or irritation | 56.1% | 58.5% | 40.0% | <0.0005 |
| Itching | 37.2% | 37.3% | 37.1% | 0.979 |
| Vaginal discharge | 22.3% | 22.0% | 24.3% | 0.550 |
| Urinary incontinence | 33.6% | 32.3% | 42.1% | 0.021 |
| Urinary urgency | 33.5% | 33.2% | 35.7% | 0.550 |
| Urinary frequency | 34.5% | 34.3% | 35.7% | 0.750 |
| Dysuria | 10.8% | 10.4% | 13.6% | 0.255 |
| Recurrent urinary infections | 15.2% | 14.7% | 18.6% | 0.233 |
| Postcoital cystitis | 8.1% | 8.3% | 6.4% | 0.445 |
| Abdominal pain | 16.1% | 16.7% | 12.1% | 0.168 |

Different missing data across the variables and groups.

BMI: Body Mass Index; SD: Standard Deviation; VVA: Vulvovaginal atrophy

Supplementary Table II. Health status, EQ5DL and dimensions: Percentages of levels 1, 2, 3 by dimension according to VVA status confirmation

|  | | **Women evaluable for Parts BCD**  **(N=1066)** | **Women with VVA confirmed (N=926)** | **Women with non-VVA confirmed**  **(N=140)** | ***p*** |
| --- | --- | --- | --- | --- | --- |
| EQ5DL overall score, mean±SD (median) | | 0.909±0.101 (0.945) | 0.907±0.103 (0.945) | 0.923±0.087 (0.945) | 0.074 |
| Health Status EQ-VAS, mean±SD (median) | | 69.1±15.4 (70) | 68.6±15.0 (70) | 72.4±17.3 (75) | 0.008 |
| EQ5DL dimensions | |  |  |  |  |
| Mobility | Level 1 | 85.1% | 84.0% | 92.0% | 0.015 |
|  | Level 2 | 14.9% | 16.0% | 8.0% |
|  | Level 3 | 0.0% | 0.0% | 0.0% |
| Self-care | Level 1 | 93.7% | 93.2% | 97.1% | 0.083 |
|  | Level 2 | 6.3% | 6.8% | 2.9% |
|  | Level 3 | 0.0% | 0.0% | 0.0% |
| Daily activities | Level 1 | 85.5% | 85.2% | 87.6% | 0.609 |
|  | Level 2 | 14.1% | 14.3% | 12.4% |
|  | Level 3 | 0.4% | 0.4% | 0.0% |
| Pain/Discomfort | Level 1 | 48.9% | 48.9% | 48.9% | 0.836 |
|  | Level 2 | 48.1% | 47.9% | 48.9% |
|  | Level 3 | 3.0% | 3.1% | 2.2% |
| Anxiety/Depression | Level 1 | 45.7% | 44.6% | 52.6% | 0.217 |
|  | Level 2 | 48.8% | 49.8% | 42.3% |
|  | Level 3 | 5.5% | 5.5% | 5.1% |

Level 1=no problems. Level 2=some problems. Level 3=serious problems.

EQ5DL: EuroQol questionnaire; EQ-VAS: EuroQol visual analog scale; SD: Standard Deviation; VVA: Vulvovaginal atrophy

Different missing data across the variables and groups.

Supplementary Table III. Questionnaires: DIVA quality of life: overall score and components according to VVA status confirmation

|  | **Women evaluable for Parts BCD**  **(N=1066)** | **Women with VVA confirmed (N=926)** | **Women with non-VVA confirmed**  **(N=140)** | ***p*** |
| --- | --- | --- | --- | --- |
| DIVA-total [(23 items)], mean±SD (median) | 0.943±0.667  (0.847) | 0.975±0.670 (0.889) | 0.734±0.607 (0.559) | <0.0005 |
| DIVA-A [daily activities (items 1–5)], mean±SD (median) | 0.647±0.812 (0.400) | 0.667±0.816 (0.400) | 0.511±0.773 (0.200) | 0.029 |
| DIVA-B [emotional well-being (items 6–9)], mean±SD (median) | 0.828±0.917 (0.500) | 0.869±0.924 (0.500) | 0.557±0.827 (0.000) | <0.0005 |
| DIVA-C [sexual functioning (items 10–18)], mean±SD (median) | 1.389±0.929 (1.333) | 1.417±0.923 (1.375) | 1.200±0.953 (1.163) | 0.014 |
| DIVA-D [self-concept and body image (items 19–23)], mean±SD (median) | 0.996±1.039 (0.800) | 1.038±1.064 (0.800) | 0.717±0.810 (0.400) | <0.0005 |

Different missing data across the variables and groups.

DIVA: Day-to-Day Impact of Vaginal Ageing; SD: Standard Deviation; VVA: Vulvovaginal atrophy

Supplementary Table IV. Questionnaires: FSFI and FSDS sexual function (impact on VVA)

|  | **Women evaluable for Parts BCD**  **(N=1066)** | **Women with VVA confirmed (N=926)** | **Women with non-VVA confirmed**  **(N=140)** | ***p*** |
| --- | --- | --- | --- | --- |
| FSFI-total [(19 items)], mean±SD (median) | 16.4±9.9 (18.4) | 15.9±9.7 (17.8) | 19.9±10.7 (23.9) | <0.0005 |
| Desire, mean±SD (median) | 2.7±1.2 (2.4) | 2.7±1.2 (2.4) | 3.1±1.2 (3.6) | <0.0005 |
| Arousal, mean±SD (median) | 2.5±1.7 (2.7) | 2.5±1.7 (2.4) | 3.0±1.9 (3.3) | 0.004 |
| Lubrication, mean±SD (median) | 2.7±2.0  (3.0) | 2.6±1.9 (3.0) | 3.4±2.2 (3.9) | <0.0005 |
| Orgasm, mean±SD (median) | 2.9±2.1  (3.2) | 2.8±2.1 (3.2) | 3.5±2.2 (4.0) | 0.001 |
| Satisfaction, mean±SD (median) | 3.1±1.8  (3.6) | 3.0±1.8 (3.6) | 3.7±1.9 (4.4) | <0.0005 |
| Pain, mean±SD (median) | 2.9±2.1  (3.2) | 2.8±2.1 (3.2) | 3.6±2.3 (4.4) | <0.0005 |
| Female Sexual Dysfunction (FSDS-R score ≥11) | 35.8% | 37.7% | 23.6% | 0.001 |
| FSDS-R (total score), mean±SD (median) | 9.8±12.1 (4.0) | 10.3±12.3 (5.0) | 6.6±9.9 (2.0) | <0.0005 |

Different missing data across the variables and groups.

FSDS-R: Female Sexual Distress Scale-revised; FSFI: Female Sexual Function Index; SD: Standard Deviation; VVA: Vulvovaginal atrophy

Supplementary Table V. Vaginal atrophy, vulvar atrophy and VVA

|  | **Women evaluable for Parts BCD**  **(N=1066)** | **Women with VVA confirmed (N=926)** | **Women with non-VVA confirmed**  **(N=140)** | ***p*** |
| --- | --- | --- | --- | --- |
| Vaginal health index, mean±SD (median) | 13.4±3.5 (13) | 12.8±3.1 (12) | 17.7±3.1 (18) | <0.0005 |
| Vaginal atrophy (Vaginal health index <15) | 67.0% | 74.9% | 15.0% | <0.0005 |
| Vulva health index, mean±SD (median) | 9.1±4.6 (9) | 9.8±4.3 (12) | 4.3±2.7 (4) | <0.0005 |
| Severe vulvar atrophy (a score of 3 in any one category or a total of 8) | 54.6% | 62.3% | 5.0% | <0.0005 |
| VVA presence confirmed during the gynaecologic visit | 926/1066=  86.9% | 926/926=100.0% | 0/140=0.0% | - |

Different missing data across the variables and groups.

SD: Standard Deviation; VVA: Vulvovaginal atrophy

Supplementary Table VI. Vulvovaginal discomfort (severity of symptoms)

|  | **Women with VVA confirmed (N=926)** | | | | **Women with non-VVA confirmed**  **(N=140)** | | | |  |
| --- | --- | --- | --- | --- | --- | --- | --- | --- | --- |
| **VVA Symptoms** | **Absent** | **Mild** | **Moderate** | **Severe** | **Absent** | **Mild** | **Moderate** | **Severe** | ***p*** |
| Vaginal dryness (inside) | 17.4% | 26.6% | 35.7% | 20.3% | 30.7% | 39.3% | 22.1% | 7.9% | <0.0005 |
| Vaginal dryness (outside) | 27.2% | 25.4% | 34.0% | 13.4% | 45.0% | 30.7% | 20.7% | 3.6% | <0.0005 |
| Pain during intercourse (inside) | 38.7% | 19.5% | 24.4% | 17.4% | 58.6% | 23.6% | 7.9% | 10.0% | <0.0005 |
| Pain during intercourse at penetration | 37.0% | 19.8% | 23.2% | 20.0% | 50.0% | 29.3% | 10.0% | 10.7% | <0.0005 |
| Pain during exercise | 79.7% | 12.4% | 7.2% | 0.6% | 88.6% | 7.9% | 2.9% | 0.7% | 0.077 |
| Bleeding during intercourse | 83.4% | 9.6% | 5.6% | 1.4% | 95.0% | 5.0% | 0.0% | 0.0% | 0.002 |
| Bleeding during sexual contact | 87.0% | 7.0% | 4.9% | 1.1% | 97.1% | 2.9% | 0.0% | 0.0% | 0.005 |
| Burning or irritation (inside) | 41.0% | 30.0% | 21.9% | 7.0% | 56.4% | 31.4% | 9.3% | 2.9% | <0.0005 |
| Burning or irritation (outside) | 45.5% | 28.7% | 20.5% | 5.3% | 55.7% | 33.6% | 8.6% | 2.1% | 0.002 |
| Itching (inside) | 65.4% | 20.6% | 11.3% | 2.6% | 71.4% | 22.9% | 3.6% | 2.1% | 0.043 |
| Itching (outside) | 58.6% | 25.1% | 12.6% | 3.7% | 67.9% | 20.7% | 7.9% | 3.6% | 0.173 |
| Vaginal discharge | 68.8% | 21.5% | 7.6% | 2.2% | 67.9% | 25.7% | 5.7% | 0.7% | 0.414 |
| Urinary incontinence | 62.1% | 23.3% | 12.0% | 2.6% | 64.3% | 25.7% | 7.9% | 2.1% | 0.513 |
| Urinary urgency | 55.9% | 23.8% | 16.0% | 4.3% | 59.3% | 25.7% | 11.4% | 3.6% | 0.525 |
| Urinary frequency | 49.2% | 23.0% | 21.7% | 6.0% | 52.1% | 24.3% | 19.3% | 4.3% | 0.735 |
| Urinary difficulties | 87.1% | 8.0% | 4.5% | 0.3% | 89.3% | 7.9% | 2.9% | 0.0% | 0.726 |
| Recurrent urinary tract infections | 76.1% | 15.2% | 6.4% | 2.3% | 80.7% | 11.4% | 6.4% | 1.4% | 0.589 |
| Postcoital cystitis | 85.4% | 9.4% | 4.1% | 1.1% | 92.1% | 5.0% | 2.9% | 0.0% | 0.152 |
| Abdominal pain | 72.5% | 17.0% | 9.5% | 1.1% | 84.3% | 12.1% | 2.9% | 0.7% | 0.015 |

Different missing data across the variables and groups.

VVA: Vulvovaginal atrophy

Supplementary Table VII. Symptoms’ severity total scores

|  | **Women evaluable for Parts BCD**  **(N=1066)** | **Women with VVA confirmed (N=926)** | **Women with non-VVA confirmed**  **(N=140)** | ***p*** |
| --- | --- | --- | --- | --- |
| Vaginal symptoms total score, mean±SD (median) | 6.1±4.6 (5) | 6.4±4.7 (6) | 4.0±3.4 (3) | <0.0005 |
| Vulvar symptoms total score, mean±SD (median) | 3.0±2.5 (2) | 3.1±2.6 (3) | 2.0±2.2 (1) | <0.0005 |
| Urinary symptoms total score, mean±SD (median) | 2.8±3.0 (2) | 2.8±3.0 (2) | 2.4±2.4 (2) | 0.044 |
| All symptoms total score, mean±SD (median) | 12.2±8.5 (10) | 12.7±8.6 (11) | 8.6±6.2 (7) | <0.0005 |

Different missing data across the variables and groups.

SD: Standard deviation; VVA: Vulvovaginal atrophy
